# Supplementary material
Source: HighWire-hosted journal article supplement (https://ez-admanager.com/highwire/filestream/136849/field_highwire_adjunct_files/0/ho_958.pdf)
Supplement: ho_958.pdf [file ho_958.pdf]

# CGRP受体拮抗剂Telcagepant预防偏头痛的 随机对照临床研究

Tony W. Ho, MD; Kathryn M. Connor, MD; Ying Zhang, PhD; Eric Pearlman, MD, PhD;  
Janelle Koppenhaver, MA; Xiaoyin Fan, PhD; Christopher Lines, PhD; Lars Edvinsson, MD;  
Peter J. Goadsby, MD; David Michelson, MD

**目的：**评价降钙素基因相关肽(calcitonin gene-related peptide, CGRP)受体拮抗剂 Telcagepant 对预防偏头痛是否有效。

**方法：**本研究采用随机、双盲、安慰剂对照的多中心临床试验,在4周的基线时间内,偏头痛发作持续达到3-14天的患者被随机分为 Telcagepant 140 mg 组、Telcagepant 280 mg 组和安慰剂组,各组给予药物或安慰剂干预2次/天,持续12周。采用平均每月头痛、偏头痛或拟诊偏头痛(头痛加至少一个相关症状)的天数进行疗效评价。

**结果：**该临床试验开展后因安全监督委员会对肝毒性的考虑而终止。终止时共纳入660例患者,其中656例患者接受过至少一次以上的剂量的药物干预,14名患者完成了试验。平均治疗时间为48~50天。Telcagepant 组中13例患者丙氨酸转氨酶(alanine aminotransferase, ALT)升高达到或超过正常上限3倍,其中7例患者天冬氨酸转氨酶(aspartate aminotransferase, AST)升高达到或超过正常上限3倍。2例患者在干预起始2~6周内出现症状性转氨酶水平升高,停药后缓解。该研究原计划在干预12周后进行效果分析,但因数据受限未能进行。现有数据表明, Telcagepant 较安慰剂能大幅减少平均每月头痛天数(140 mg 组 = -2.9, 280 mg 组 = -3.1, 安慰剂组 = -1.7,  $p < 0.05$ )和平均每月偏头痛天数(140mg 组 = -2.7, 280 mg 组 = -3.0, 安慰剂组 = -1.6,  $p < 0.05$ )。

**结论：**这些数据表明 CGRP 受体拮抗剂有可能具有预防偏头痛发作的疗效。但是,试验观察到的 Telcagepant 导致的转氨酶增高限制了该药的临床应用。

**证据分类：**本研究为II级证据,与安慰剂组相比,每日服用 Telcagepant 可使偏头痛患者平均每月头痛天数减少1.4天,但有2.5%的患者服用 Telcagepant 后血清丙氨酸转氨酶水平升高。*Neurology*® 2014;83:958-966

(林鹏飞 译 焉传祝 审校)
